# Supplementary material for: Synergistic Charge Transfer and Surface Defect Effects in Cellulose-PANI-ZnO Sensors for Early Lung Cancer VOC Diagnosis
Source: Research Square preprint supplement (doi:10.21203/rs.3.rs-8306088/v1), 2025-12-17
Supplement: Supplementary file 1 [file f5d5ec020a0e9d13e04a2dac.docx]

**Supplementary**

The detailed TGA plot for each of the material with weight loss percentage is given in the supplementary document (Fig. S1).


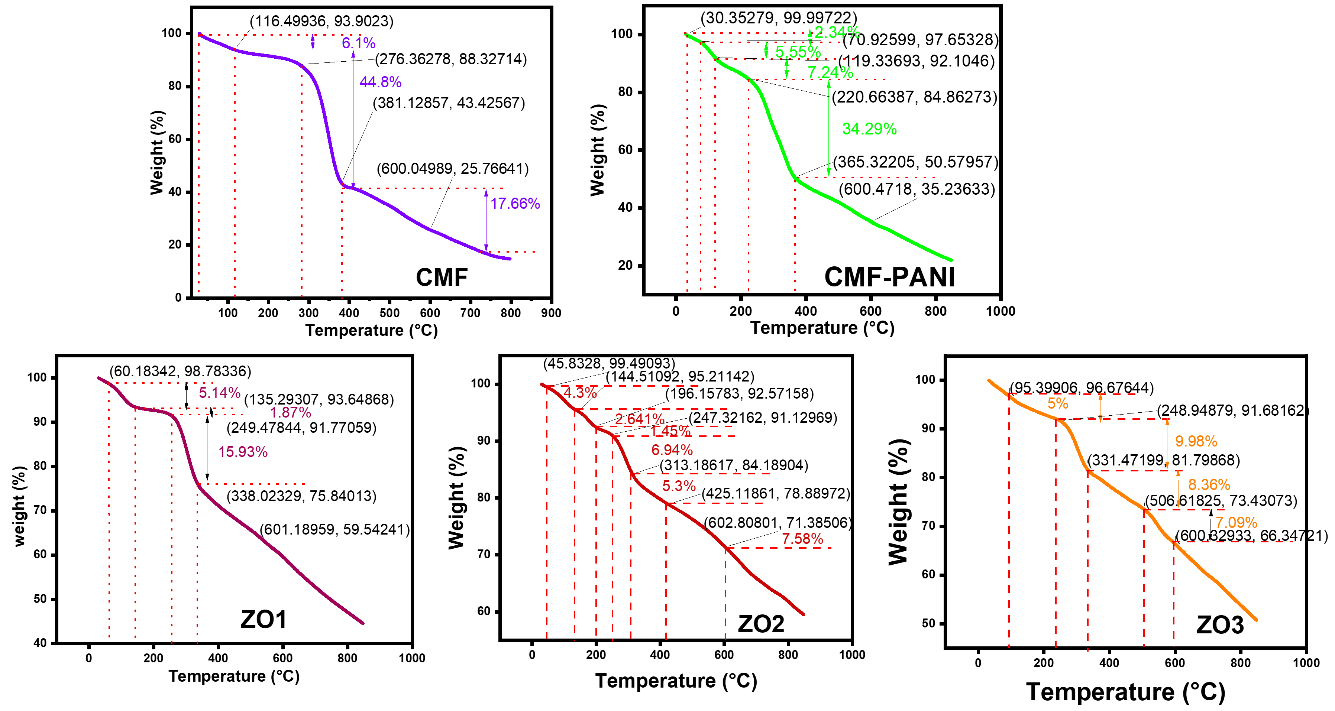


**Figure S1**. The TGA plot with weight loss indications for CMF, CMF-PANI, ZO1, ZO2, ZO3

**Table S1**. The weight loss percentage at each stage for the materials

| S. No | Material | Wt. loss percentage up to 250 °C | Remaining Wt. % at 600 °C | Remaining Wt.% at 800 °C |
| --- | --- | --- | --- | --- |
|  | CMF | 10.11 | 25.76 | 14.77 |
|  | CMF-PANI | 19.36 | 35.23 | 24.21 |
|  | ZO1 | 8.6 | 59.50 | 47.05 |
|  | ZO2 | 9.3 | 71.4 | 61.79 |
|  | ZO3 | 8.6 | 66.29 | 53.75 |

**Gas sensing setup (microliter to ppm conversion)**

To calculate the concentration of 2 μL of acetone in 500 mL empty bubbler at a temperature of 333 K we assume that the entire 2 μL of acetone is vaporised by heating, the bubbler volume is 0.5 L (0.0005 m3) the gas behaves ideally and the pressure is 1 atm. The volume of the acetone 2 μL is first converted into moles which is approximately mol by using density of acetone and molar mass of acetone.

mol

At 333 K and 1 atm, using ideal gas law the total moles of air in 500 mL is calculated by,

Mole fraction is obtained by,
